# Supplementary material
Source: Springer Nature journal article supplement (https://www.springermedizin.de/resource/supplementary/13014_2013_1069_MOESM1_ESM.pdf/9635242)

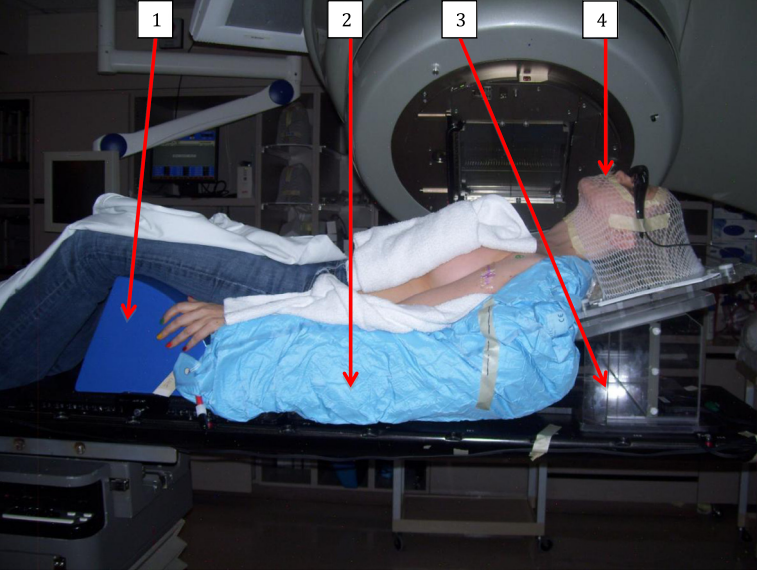

1

2

3

4

Supplement: MOESM1 [file 9635242]
